## The CNS President's Message

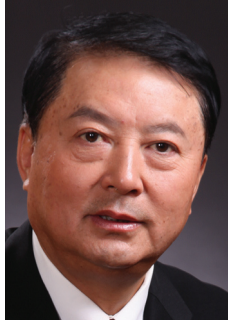

**Shoujun Wang**

The Chinese Nuclear Society (CNS) congratulates readers, reviewers, and editors of the ASME Journal of Nuclear Engineering and Radiation Science (ASME J. NERS) and nuclear experts and specialists all around the world with significant achievements and new milestones in nuclear-power industry!

As a clean, safe, and efficient energy source, nuclear power has become an important part of the electricity generation for the globe to jointly promote low-carbon sustainable development. After more than six decades of development,

China has gradually formed a complete and independent nuclear-industry system. Since the beginning of the 21st century, China's nuclear industry has entered a period of rapid growth featuring the self-reliant, serialized, and large-scale development of nuclear power.

As of September 2018, China's mainland has 43 nuclear power units in operation, ranking third in the world by a number of operating reactors, and another 14 units under construction, ranking China first in the world by a number of reactors being built and by a number of reactors put into operation within last 7 years.

Nuclear power is a safe, clean, and cost-effective source of energy, and the development of nuclear power will play an important role in optimizing energy structure, protecting ecological environment, reducing greenhouse-gas emissions such as carbon dioxide, as well as mitigating the impact of smog crisis.

Chinese Nuclear Society is THE FAMILY of nuclear-science and technology researchers. It was founded in 1980 and, currently, has more than 10,000 individual members, 166 unit members, 30 professional divisions, and 8 working committees. As an important academic institution for international nongovernmental nuclear science and technology exchanges and cooperation, CNS has been committed to build a high-level science and technology exhibition and academic exchange platform. We aim to make

contributions to the development of China's nuclear industry by exploring innovative approaches to mobilize nuclear-engineering researchers, promote the development of nuclear science and technology as well as the knowledge dissemination and international exchanges in this regard.

Chinese Nuclear Society will, as always, strengthen cooperation with nuclear science and technology institutions and researchers around the world to promote the global development of nuclear energy.

As one of the most influential academic exchange platforms in its field, ICONE is a conference of global significance that enables various countries to have exchanges and discussions on research results, updates, international focuses, and cutting-edge technical issues on nuclear engineering. With the joint efforts of ASME, JSME, and CNS, it has become an academic event that the industry's top experts, scholars, and outstanding young researchers would not miss. During this conference, representatives, experts, and scholars from over 30 countries and regions around the world will discuss the latest technological development trends and showcase the latest research results. China hosted ICONEs in 2005, 2010, 2013, 2017, and will host again in 2021.

ICONE-27 (May 19–24, 2019; Tsukuba International Congress Center, Tsukuba, Ibaraki, Japan) will be hosted by the Japan Society of Mechanical Engineers (JSME). ICONES arouse great passion among nuclear researchers and institutes both in China and around the world, inject vitality into the subject fields, and promote the scientific and technological progress in these areas. I hope that after ICONES's meeting, enterprises and academic institutions from various countries will continue to engage in in-depth discussions on these issues so as to better leverage the experience and achievements fostered during the meeting.

**Shoujun Wang**  
President of CNS (Chinese Nuclear Society),  
No. 1 Nansixiang Sanlihe,  
Xicheng District,  
Beijing 100045, China
